# Supplementary material
Source: PubMed Central journal article supplement (PMC2719368)
Supplement: M109.008680_1.pdf [file M109.008680_1.pdf]

|                                                     | WT+L-ser                                                 | N100Y + L-ser                                            | N100Y                                                    | N100C                                                    | N100W                                                 |
|-----------------------------------------------------|----------------------------------------------------------|----------------------------------------------------------|----------------------------------------------------------|----------------------------------------------------------|-------------------------------------------------------|
| <b>Data collection</b>                              |                                                          |                                                          |                                                          |                                                          |                                                       |
| Space group                                         | C222 <sub>1</sub>                                        | C222 <sub>1</sub>                                        | C222 <sub>1</sub>                                        | C222 <sub>1</sub>                                        | C222 <sub>1</sub>                                     |
| Cell dimensions (Å)                                 | <i>a</i> = 74.3,<br><i>b</i> = 108.4,<br><i>c</i> = 91.2 | <i>a</i> = 73.6,<br><i>b</i> = 107.1,<br><i>c</i> = 89.9 | <i>a</i> = 71.7,<br><i>b</i> = 109.7,<br><i>c</i> = 91.4 | <i>a</i> = 75.2,<br><i>b</i> = 107.4,<br><i>c</i> = 88.8 | <i>a</i> =71.9,<br><i>b</i> =109.8,<br><i>c</i> =91.7 |
| Resolution (Å)*<br>(high resolution)                | 34.9-1.50<br>(1.54-1.5)                                  | 28.5-2.14<br>(2.2-2.14)                                  | 27.4 -1.50<br>(1.54-1.5)                                 | 29.1-1.25<br>(1.28-1.25)                                 | 27.4 – 1.43<br>(1.47-1.43)                            |
| <i>R</i> <sub>merge</sub> (%)                       | 8.5 (51.9)                                               | 6.2 (47.3)                                               | 3.9 (40.7)                                               | 5.9 (51.8)                                               | 4.2 (38.6)                                            |
| <i>I</i> / <i>σI</i>                                | 8.6 (1.6)                                                | 17.8 (2.9)                                               | 22 (3.4)                                                 | 15.6 (2.8)                                               | 21.7 (3.1)                                            |
| Completeness (%)                                    | 98.8 (88.9)                                              | 99.5 (97)                                                | 99.7 (98.3)                                              | 99.7 (99.6)                                              | 98 (88)                                               |
| Aver. redundancy                                    | 8 (3.2)                                                  | 4 (4)                                                    | 4.2 (4.3)                                                | 4.0 (3.9)                                                | 4.7 (3.3)                                             |
| Beamline                                            | BM14                                                     | BM14                                                     | BM14                                                     | Id14-4                                                   | BM14                                                  |
| Wavelength                                          | 0.87260                                                  | 0.97626                                                  | 0.97626                                                  | 0.97900                                                  | 0.99996                                               |
| <b>Refinement</b>                                   |                                                          |                                                          |                                                          |                                                          |                                                       |
| Unique reflections                                  | 55582                                                    | 79794                                                    | 54786                                                    | 94021                                                    | 62574                                                 |
| <i>R</i> <sub>work</sub> / <i>R</i> <sub>free</sub> | 15.7 / 18.8                                              | 19.5/24.9                                                | 15.7/ 18.7                                               | 14.8 /16.4                                               | 16.1 / 18.9                                           |
| No. atoms                                           |                                                          |                                                          |                                                          |                                                          |                                                       |
| Protein                                             | 3062                                                     | 3000                                                     | 3036                                                     | 3030                                                     | 3029                                                  |
| Water                                               | 354                                                      | 150                                                      | 420                                                      | 479                                                      | 399                                                   |
| PLP / ald                                           | 22                                                       | 22                                                       | 17                                                       | 17                                                       | 17                                                    |
| B-factors (Å <sup>2</sup> )**                       |                                                          |                                                          |                                                          |                                                          |                                                       |
| Protein                                             | 20.7                                                     | 32.4                                                     | 16.8                                                     | 11.0                                                     | 15.9                                                  |
| Water                                               | 20.8                                                     | 20.6                                                     | 16.9                                                     | 15.1                                                     | 16.3                                                  |
| PLP                                                 | 12.6                                                     | 25.3                                                     | 17.0                                                     | 8.9                                                      | 16.9                                                  |
| Rmsd bonds (Å)<br>/ angles (°)                      | 0.008 / 1.2                                              | 0.008 / 1.1                                              | 0.008 / 1.2                                              | 0.006 / 1.2                                              | 0.008 / 1.2                                           |
| B-factor deviation<br>Bond/angle (Å <sup>2</sup> )  |                                                          |                                                          |                                                          |                                                          |                                                       |
| Main chain                                          | 0.6 / 1.1                                                | 0.3/0.6                                                  | 0.7 / 1.1                                                | 0.5 / 0.9                                                | 0.7 / 1.1                                             |
| Side chain                                          | 1.8 / 2.9                                                | 1.0/1.7                                                  | 1.8 / 2.8                                                | 1.5 / 2.4                                                | 1.8 / 2.8                                             |
| PDB code                                            | 2w8j                                                     | 2w8w                                                     | 2w8u                                                     | 2w8t                                                     | 2w8v                                                  |

- Numbers in parenthesis refer to highest resolution shell
- \*\* These B's have the TLS factors added back in using TLSANAL, the deposited coordinates are residual B-factors only.

### Supplementary Table
